# Supplementary material
Source: Springer Nature journal article supplement (https://www.springermedizin.de/resource/supplementary/12876_2013_1241_MOESM4_ESM.pdf/9438306)

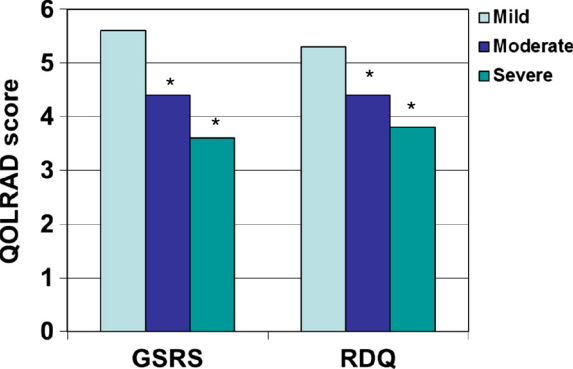

\* p<0.001 compared to mild

Supplement: MOESM4 [file 9438306]
